# Supplementary material for: CodonTest: Modeling Amino Acid Substitution Preferences in Coding Sequences
Source: PubMed Central journal article supplement (PMC2924240; doi:10.1371/journal.pcbi.1000885), 2010-08-19
Supplement: pcbi.1000885.s001.pdf [file pcbi.1000885.s001.pdf]

**Table S1.** Difference in mean (standard deviation) model  $mBIC$  scores for multi-taxon simulations.  $D$  is the average pairwise divergence;  $mBIC_n$  is the difference in model  $mBIC$  score between the model with  $n - 1$  rates and a more complex with  $n$  rates;  $P$  is the proportion of correctly identified models for 100 simulations. Positive  $mBIC$  scores indicate preference for the more complex model with  $n$  rates, i.e.  $mBIC_n = mBIC_{n-1} - mBIC_n$ .

| simulation        | num taxa | D   | $mBIC_2$       | $mBIC_3$       | $mBIC_4$      | P    |
|-------------------|----------|-----|----------------|----------------|---------------|------|
| single rate       | 16       | 0.2 | -44.01 (4.22)  | n/a            | n/a           | 1.00 |
| (0.25, 1.0)       | 16       | 0.2 | 345.12 (37.45) | -28.66 (3.29)  | n/a           | 1.00 |
| (0.25, 0.5, 1.0)  | 16       | 0.2 | 195.38 (32.0)  | -19.233 (7.94) | -0.28 (2.76)  | 0.23 |
| (0.25, 0.75, 1.5) | 16       | 0.2 | 426.21 (33.86) | 94.70 (18.30)  | -13.61 (2.46) | 1.00 |
| (0.25, 0.5, 1.0)  | 16       | 0.5 | 516.08 (46.39) | 90.28 (18.28)  | -13.80 (2.17) | 1.00 |
| (0.25, 0.5, 1.0)  | 32       | 0.2 | 378.84 (42.03) | 54.04 (26.96)  | -13.08 (5.48) | 0.89 |
