# Supplementary material for: CodonTest: Modeling Amino Acid Substitution Preferences in Coding Sequences
Source: PubMed Central journal article supplement (PMC2924240; doi:10.1371/journal.pcbi.1000885), 2010-08-19
Supplement: pcbi.1000885.s002.pdf [file pcbi.1000885.s002.pdf]

**Table S2.** Randomly selected Pandit data model comparisons using BIC. In each case we fitted the ECM, LCAP and  $GA_s$  models to each of four randomly selected Pandit datasets. Model ranks (BIC/difference in BIC score relative to the best model) are shown.

| Source                 | Pandit/Pfam PF00207   | Pandit/Pfam PF01486 | Pandit/Pfam PF00829       | Pandit/Pfam PF05697           |
|------------------------|-----------------------|---------------------|---------------------------|-------------------------------|
| Description            | Alpha-2-macroglobulin | K-box region        | Ribosomal prokaryotic L21 | Bacterial trigger factor (TF) |
| ECM+F61                | 1 (33080.8)           | 5 (811.9)           | 1 (35613.6)               | 1 (47405)                     |
| LCAP+F61               | 7 (321.9)             | 1 (35896.4)         | 4 (893.4)                 | 6 (1687.2)                    |
| $GA_s$ ATP cone        | 2 (29.8)              | 4 (710)             | 2 (624.3)                 | 3 (1120.5)                    |
| $GA_s$ NADH5 C         | 8 (347.9)             | 2 (257.3)           | 6 (1072.1)                | 5 (1438.9)                    |
| $GA_s$ Transketolase C | 3 (80.8)              | 7 (961)             | 3 (695.1)                 | 2 (772.8)                     |
| $GA_s$ Rhodopsin       | 5 (211.1)             | 3 (605.4)           | 5 (932.8)                 | 4 (1326)                      |
| $GA_s$ YAL038W         | 6 (254.2)             | 8 (1083.9)          | 8 (1238.8)                | 7 (1712.3)                    |
| $GA_s$ HIV-1           | 4 (181.4)             | 6 (937.6)           | 7 (1130.8)                | 8 (1834.6)                    |
| $GA_s$ IAV HA          | 9 (407.1)             | 9 (1119.7)          | 9 (1393.6)                | 9 (1941.3)                    |
