# Supplementary material for: CodonTest: Modeling Amino Acid Substitution Preferences in Coding Sequences
Source: PubMed Central journal article supplement (PMC2924240; doi:10.1371/journal.pcbi.1000885), 2010-08-19
Supplement: pcbi.1000885.s003.pdf [file pcbi.1000885.s003.pdf]

**Table S3.** Qualitative comparison of structured GA models

| model 1          | model 2          | Rand statistic | Mean Random Rand | P     |
|------------------|------------------|----------------|------------------|-------|
| ATP cone         | NADH5 C          | 0.584          | 0.618            | 1     |
| ATP cone         | Transketolase C  | 0.709          | 0.657            | 1     |
| ATP cone         | Yeast YAL038W    | 0.618          | 0.618            | 0.448 |
| ATP cone         | HIV-1 <i>pol</i> | 0.674          | 0.668            | 0.178 |
| ATP cone         | IAV HA           | 0.563          | 0.578            | 0.969 |
| ATP cone         | Rhodopsin        | 0.565          | 0.618            | 1     |
| NADH5 C          | Transketolase C  | 0.617          | 0.626            | 0.903 |
| NADH5 C          | Yeast YAL038W    | 0.585          | 0.595            | 0.893 |
| NADH5 C          | HIV-1 <i>pol</i> | 0.642          | 0.663            | 0.986 |
| NADH5 C          | IAV HA           | 0.560          | 0.577            | 0.997 |
| NADH5 C          | Rhodopsin        | 0.571          | 0.594            | 1     |
| Transketolase C  | Yeast YAL038W    | 0.610          | 0.652            | 1     |
| Transketolase C  | HIV-1 <i>pol</i> | 0.707          | 0.717            | 0.916 |
| Transketolase C  | IAV HA           | 0.601          | 0.603            | 0.534 |
| Transketolase C  | Rhodopsin        | 0.558          | 0.652            | 1     |
| Yeast YAL038W    | HIV-1 <i>pol</i> | 0.635          | 0.663            | 0.995 |
| Yeast YAL038W    | IAV HA           | 0.535          | 0.577            | 1     |
| Yeast YAL038W    | Rhodopsin        | 0.604          | 0.573            | 0.005 |
| HIV-1 <i>pol</i> | IAV HA           | 0.614          | 0.609            | 0.248 |
| HIV-1 <i>pol</i> | Rhodopsin        | 0.568          | 0.663            | 1     |
